# Supplementary material
Source: publisher figshare collection journal article supplement (https://gsajournals.figshare.com/ndownloader/files/27930222)
Supplement: Supplementary file 1 [file 27930222]

## Sheet: viability
Population	Strain	Egg	Adult	Environment	egg-to-adult viability
ZI	Zi192	275	270	warm	0.981818
ZI	Zi192	305	252	warm	0.82623
ZI	Zi192	349	281	warm	0.805158
ZI	Zi192	307	175	warm	0.570033
ZI	Zi251	98	82	warm	0.836735
ZI	Zi251	212	207	warm	0.976415
ZI	Zi251	96	89	warm	0.927083
ZI	ZI251	203	207	warm	1
ZI	Zi251	80	73	warm	0.9125
ZI	Zi418	230	96	warm	0.417391
ZI	Zi418	255	158	warm	0.619608
ZI	Zi418	14	9	warm	0.642857
ZI	Zi418	12	9	warm	0.75
ZI	Zi418	26	22	warm	0.846154
FR	FR37	51	51	warm	1
FR	FR37	56	43	warm	0.767857
FR	FR37	40	38	warm	0.95
FR	FR37	130	108	warm	0.830769
FR	FR238	71	54	warm	0.760563
FR	FR238	12	10	warm	0.833333
FR	FR238	287	251	warm	0.874564
FR	FR320	123	100	warm	0.813008
FR	FR320	78	70	warm	0.897436
FR	FR320	492	441	warm	0.896341
EF	EF43	670	319	warm	0.476119
EF	EF43	380	343	warm	0.902632
EF	EF81	22	18	warm	0.818182
EF	EF81	30	29	warm	0.966667
EF	EF96	39	38	warm	0.974359
EF	EF96	27	21	warm	0.777778
SD	SD64	177	170	warm	0.960452
SD	SD64	35	25	warm	0.714286
SD	SD64	31	29	warm	0.935484
SD	SD64	169	139	warm	0.822485
SD	SD78	147	113	warm	0.768707
SD	SD78	635	578	warm	0.910236
SD	SD131	170	116	warm	0.682353
SD	SD131	540	207	warm	0.383333
ZI	Zi192	453	86	cold	0.189845
ZI	Zi192	330	75	cold	0.227273
ZI	Zi192	318	93	cold	0.292453
ZI	Zi192	490	195	cold	0.397959
ZI	Zi251	72	31	cold	0.430556
ZI	Zi251	180	78	cold	0.433333
ZI	Zi251	19	3	cold	0.157895
ZI	Zi251	83	44	cold	0.53012
ZI	Zi418	28	3	cold	0.107143
ZI	Zi418	18	2	cold	0.111111
ZI	Zi418	26	3	cold	0.115385
ZI	Zi418	45	2	cold	0.0444444
ZI	Zi418	110	3	cold	0.0272727
FR	FR37	47	49	cold	1
FR	FR37	112	75	cold	0.669643
FR	FR238	33	36	cold	1.09091
FR	FR238	34	34	cold	1
FR	FR238	37	32	cold	0.864865
FR	FR238	23	23	cold	1
FR	FR320	42	42	cold	1
FR	FR320	16	11	cold	0.6875
EF	EF43	207	161	cold	0.777778
EF	EF43	317	323	cold	1
EF	EF43	460	332	cold	0.721739
EF	EF81	17	16	cold	0.941176
EF	EF96	42	31	cold	0.738095
EF	EF96	33	24	cold	0.727273
SD	SD64	28	17	cold	0.607143
SD	SD64	183	126	cold	0.688525
SD	SD78	53	14	cold	0.264151
SD	SD78	56	38	cold	0.678571
SD	SD78	421	104	cold	0.247031
SD	SD78	290	112	cold	0.386207
SD	SD131	40	12	cold	0.3
SD	SD131	80	44	cold	0.55
